# Supplementary material
Source: publisher figshare collection journal article supplement (https://acs.figshare.com/ndownloader/files/5107438)
Supplement: Supplementary file 1 [file 5107438]

## **Supporting Information**

### **Electronic Spectra of Pure Uranyl(V) Complexes: Characteristic Absorption Bands due to $\text{U}^{\text{V}}\text{O}_2^+$ Core in Visible and Near-Infrared Region**

Koichiro Mizuoka<sup>†</sup>, Satoru Tsushima<sup>‡</sup>, Miki Hasegawa<sup>§</sup>, Toshihiko Hoshi<sup>§</sup>, and Yasuhisa Ikeda<sup>†\*</sup>

<sup>†</sup>*Research Laboratory for Nuclear Reactors, Tokyo Institute of Technology, 2-12-1-N1-34, O-okayama, Meguro-ku, Tokyo, Japan.*

<sup>‡</sup>*Institute of Physics, Stockholm University, The Albanova University Center, S-106 91, Stockholm, Sweden.* <sup>§</sup>*Department of Chemistry and Biological Science, College of Science and Engineering, Aoyama-Gakuin University, Fuchinobe, Sagamihara, Kanagawa, Japan.*

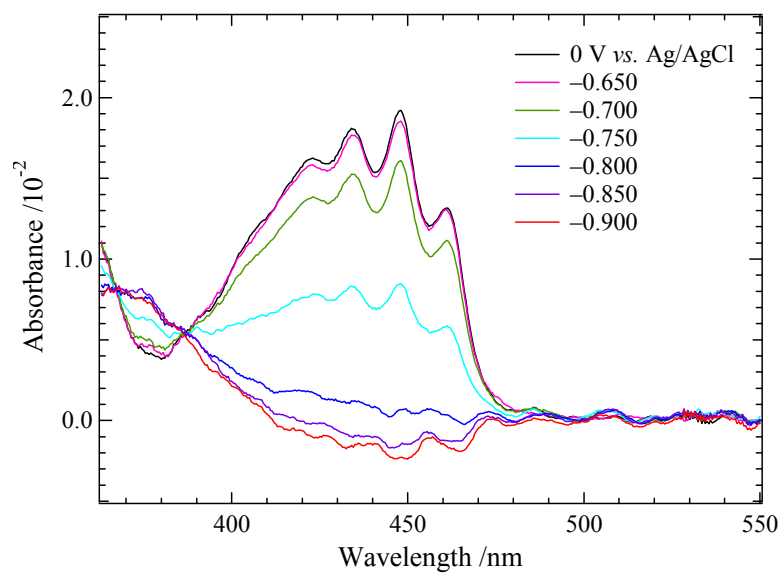

**Figure S1.** UV-visible absorption spectra measured at the applied potentials in the range from 0 to  $-0.900$  V vs. Ag/AgCl for the redox couple of  $[\text{U}^{\text{V}}\text{O}_2(\text{CO}_3)_3]^{5-}/[\text{U}^{\text{VI}}\text{O}_2(\text{CO}_3)_3]^{4-}$  ( $4.38 \times 10^{-2}$  M) in  $\text{D}_2\text{O}$  containing 1 M  $\text{Na}_2\text{CO}_3$ . Isosbestic points: 367 and 387 nm. Optical path length:  $1.89 \times 10^{-2}$  cm.

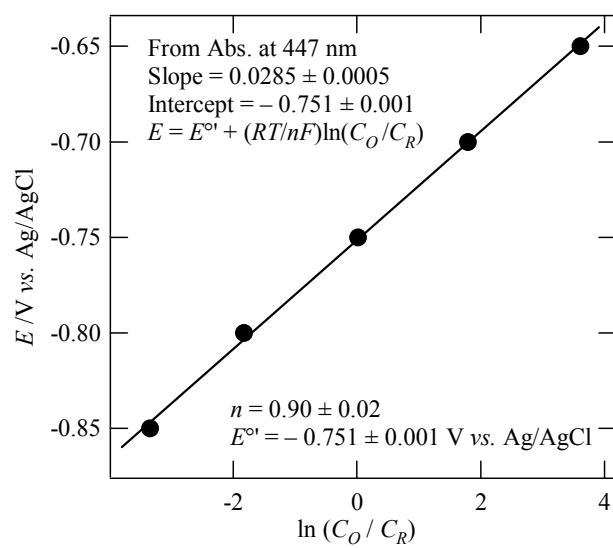

**Figure S2.** Nernstian plot for the absorbancies at 447 nm in Figure S1.
